# Supplementary material for: Nutritionist Referral Modestly Improves Weight Loss and Increases Surgery Rate in Obese Patients Seeking Total Joint Arthroplasty
Source: PubMed Central journal article supplement — Arthroplast Today. 2022 Aug 19;17:74–9. doi: 10.1016/j.artd.2022.07.018 (PMC9420426; doi:10.1016/j.artd.2022.07.018), 2022-08-19
Supplement: mmc2.pdf [file mmc2.pdf]

# INDIVIDUAL CONFLICT OF INTEREST STATEMENT

## *American Association of Hip and Knee Surgeons*

(Adopted from the American Academy of Orthopaedic Surgeons disclosure statement)

The following form **must be filled out completely and submitted by each author (example, 6 authors, 6 forms).**  
**All items require a response. If there is no relevant disclosure for a given item, enter "None."**

---

**Manuscript Title** Nutritionist Referral Improves Weight Loss and Increases Surgery Rate in Obese Patients Seeking Total Joint Arthroplasty

1. Royalties from a company or supplier (The following conflicts were disclosed)  
NONE.
2. Speakers bureau/paid presentations for a company or supplier (The following conflicts were disclosed)  
NONE.
- 3A. Paid employee for a company or supplier (The following conflicts were disclosed)  
NONE.
- 3B. Paid consultant for a company or supplier (The following conflicts were disclosed)  
NONE.
- 3C. Unpaid consultants for a company or supplier (The following conflicts were disclosed)  
NONE.
4. Stock or stock options in a company or supplier (The following conflicts were disclosed)  
NONE.
5. Research support from a company or supplier as a Principal Investigator (The following conflicts were disclosed)  
NONE.
6. Other financial or material support from a company or supplier (The following conflicts were disclosed)  
NONE.
7. Royalties, financial or material support from publishers (The following conflicts were disclosed)  
NONE.
8. Medical/Orthopaedic publications editorial/governing board (The following conflicts were disclosed)  
NONE.
9. Board member/committee appointments for a society (The following conflicts were disclosed)  
NONE.

**Each author must sign AND print or type his/her name, date and submit a separate form**

In addition, one BLINDED Conflict of Interest form (no author names used) should be submitted per manuscript with all author disclosures.

---

ERIL OLSEN  
Author Name (Print or Type)

  
Author Signature

3/3/22  
Date
